# Supplementary material for: Self-Supported Fibrous Sn/SnO2@C Nanocomposite as Superior Anode Material for Lithium-Ion Batteries
Source: MDPI journal article supplement (doi:10.3390/ma15030919), 2022-01-25
Supplement: s1 [file s1]

Supplementary

# Self-Supported Fibrous Sn/SnO<sub>2</sub>@C Nanocomposite as Superior Anode Material for Lithium-Ion Batteries

Daniele Spada, Pantaleone Bruni, Stefania Ferrari, Benedetta Albini, Pietro Galinetto, Vittorio Berbenni, Alessandro Girella, Chiara Milanese and Marcella Bini

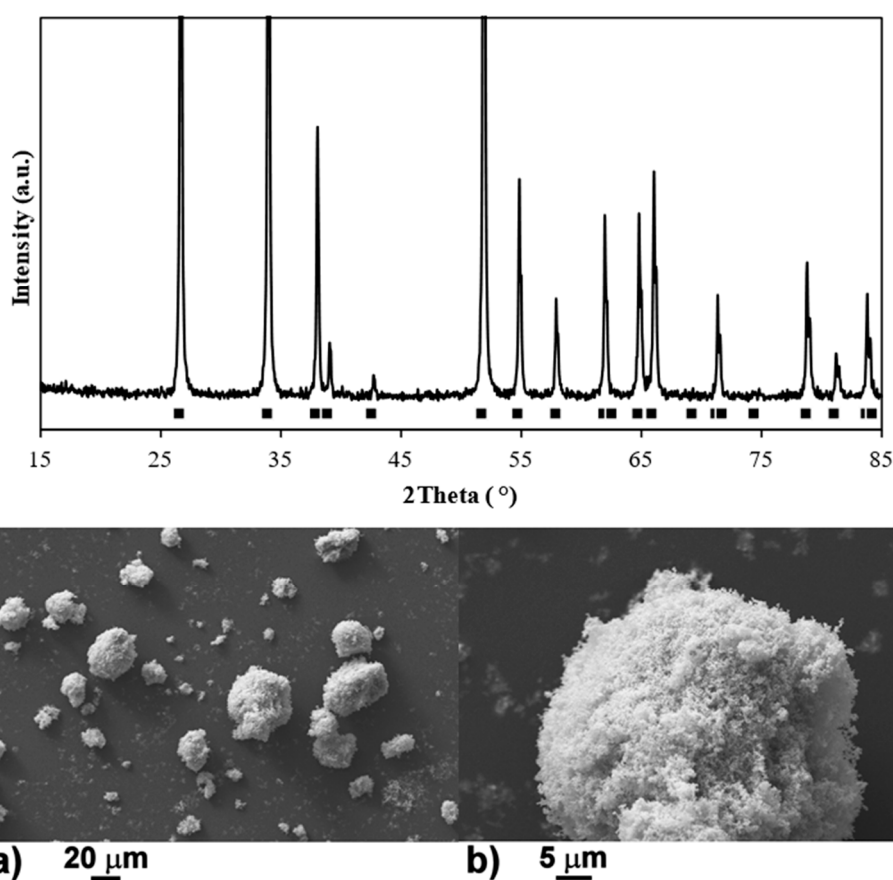

**Figure S1.** XRD pattern, with reflections of Cassiterite (squares), and SEM images at low (a) and high (b) magnification of commercial SnO<sub>2</sub>.

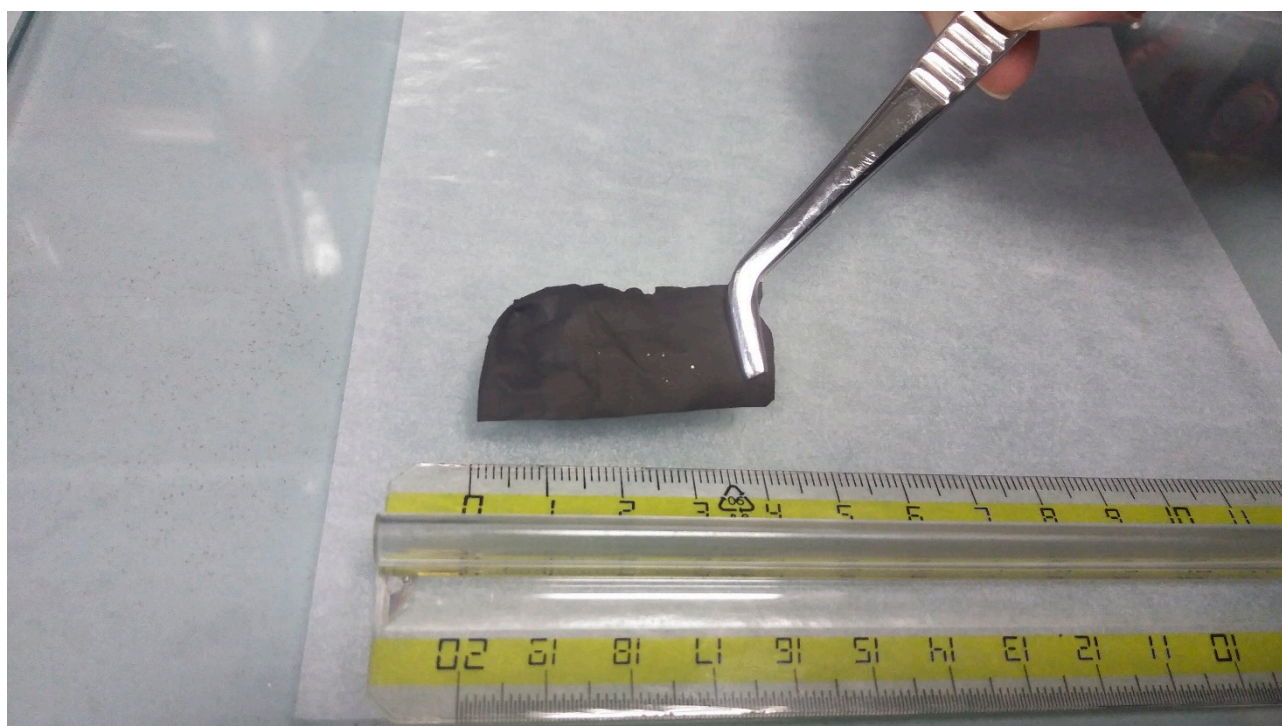

**Figure S2.** Picture of the self-supporting non-woven fabric, close to a ruler (the scale is in cm).

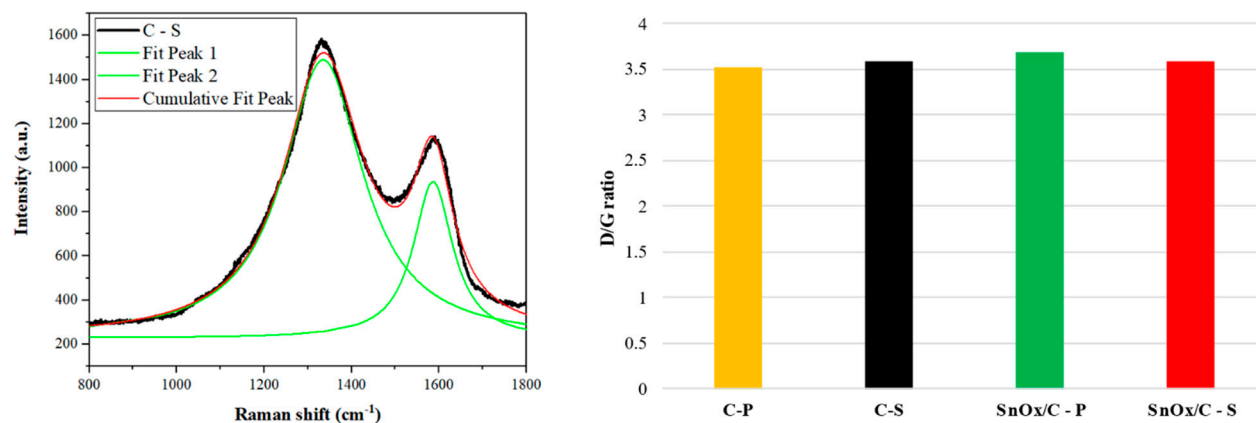

**Figure S3.** Example of fitting of Raman spectrum of C-S and corresponding ratios between the areas of the D and G bands for all the samples.

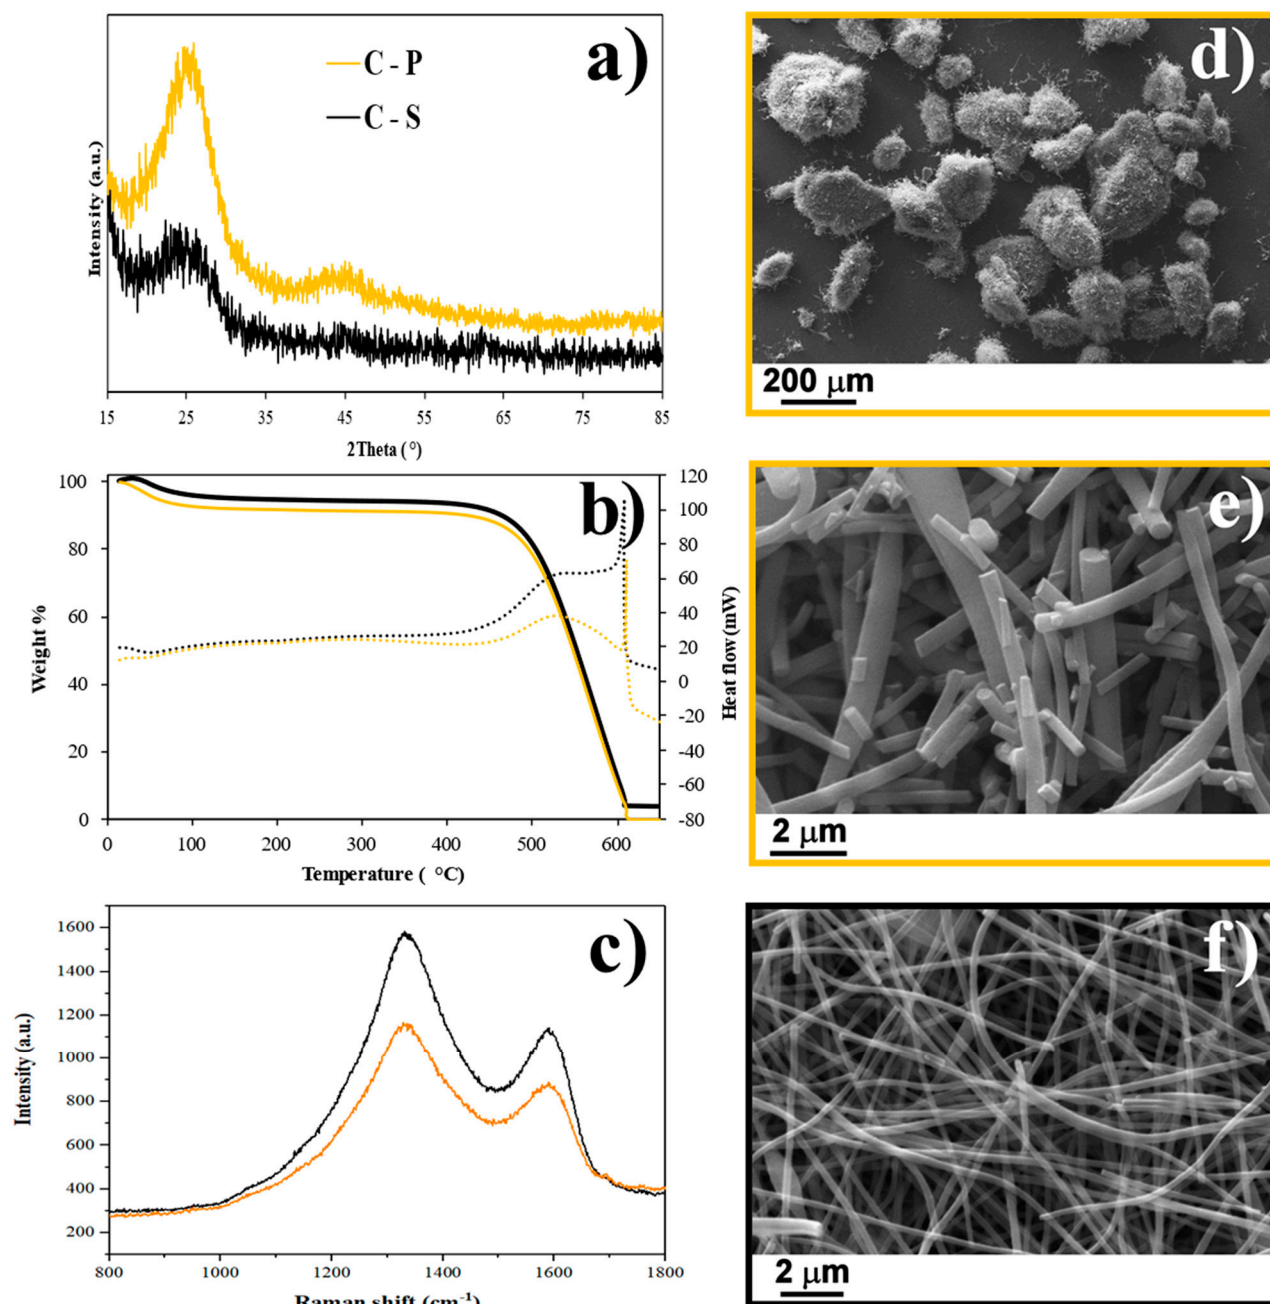

**Figure S4.** XRD patterns (a), TGA (full lines)/DSC (dotted lines) curves (b), Raman spectra (c) and SEM images (d–f) of carbonized PAN samples (orange C–P, black C–S).



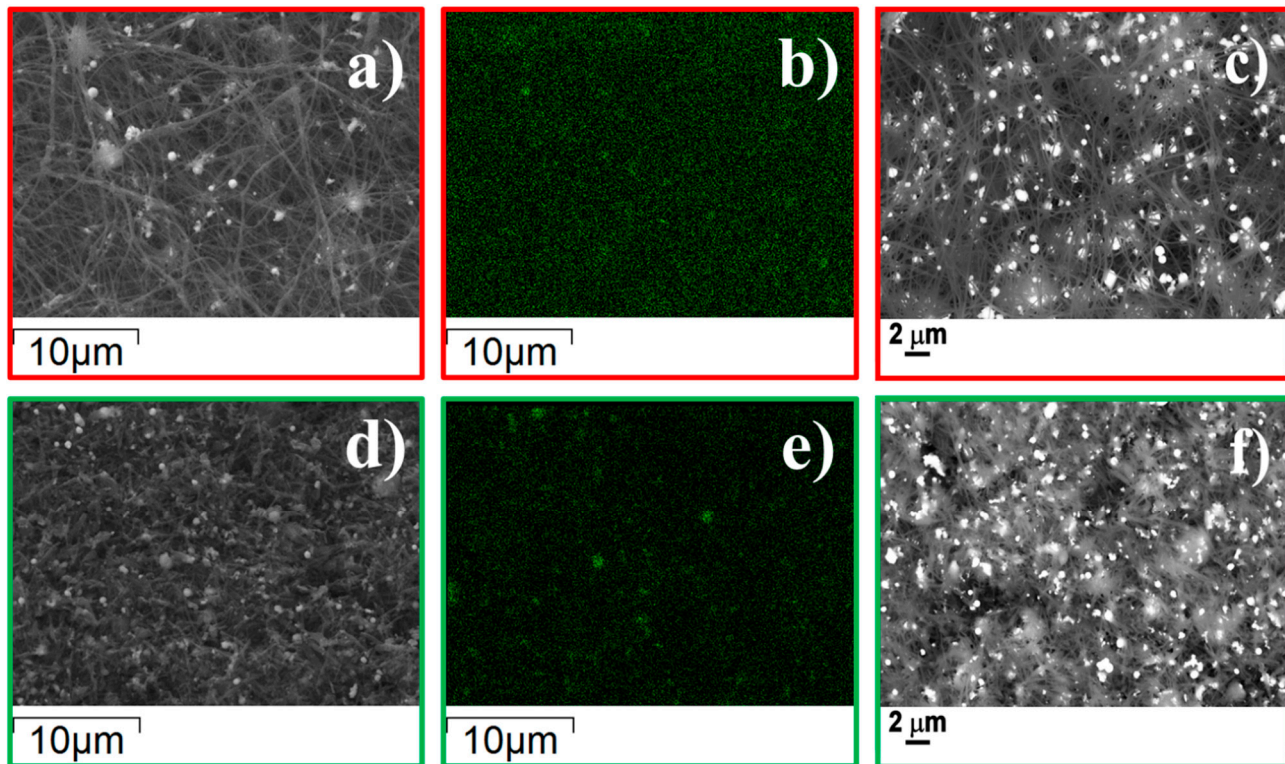

**Figure S5.** SEM images from secondary electrons, corresponding EDX maps of Sn and backscattered electrons SEM images for SnO<sub>x</sub>/C-S (a–c) and SnO<sub>x</sub>/C-P (d–f) respectively.

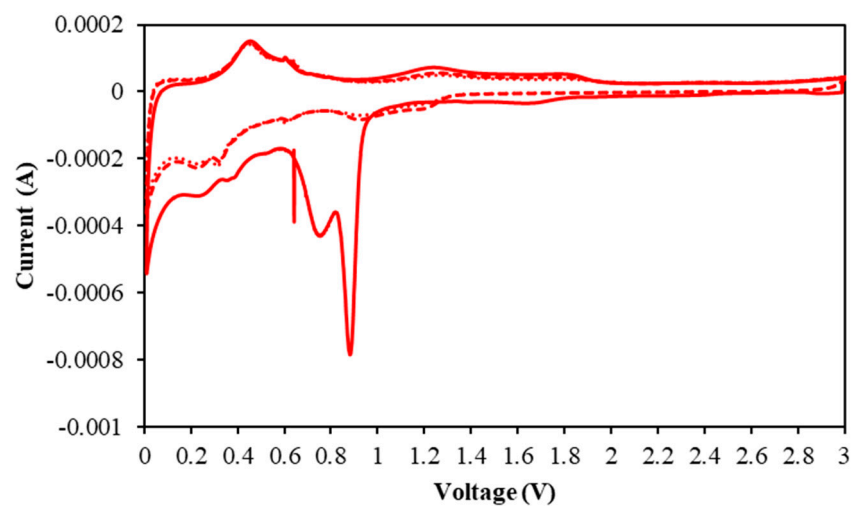

**Figure S6.** Voltammograms of the first three cycles performed at 0.1 mV/s on commercial SnO<sub>2</sub>. The first cycle is depicted with a solid line.

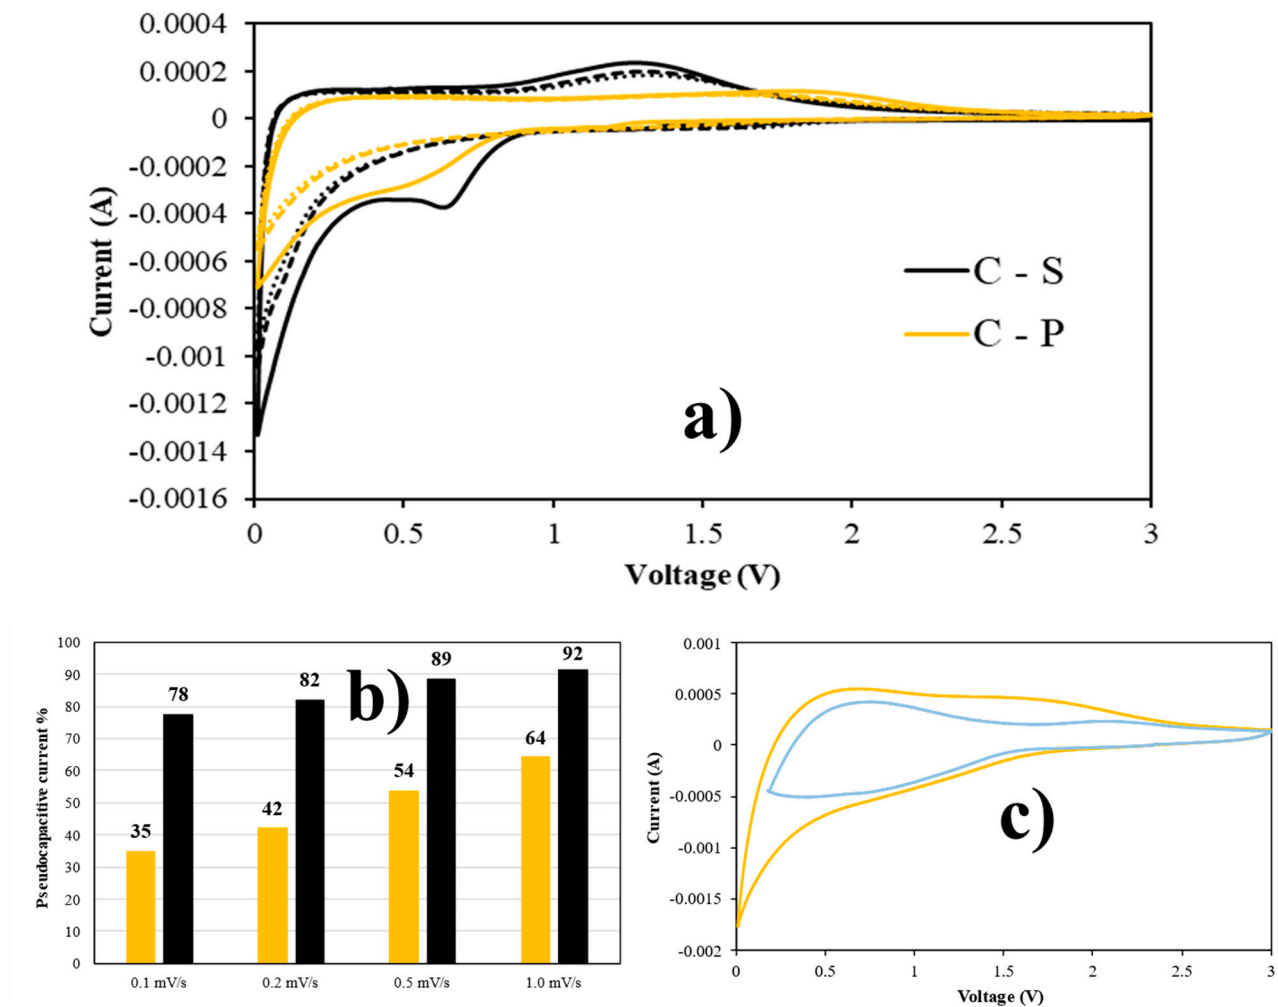

**Figure S7.** First three cycles of cyclic voltammetry of carbon samples (a). The first cycle is depicted with a full line. Histograms of the pseudocapacitive current (b) and voltammogram of C-P at 1.0 mV/s (c) with pseudocapacitive current in light blue.

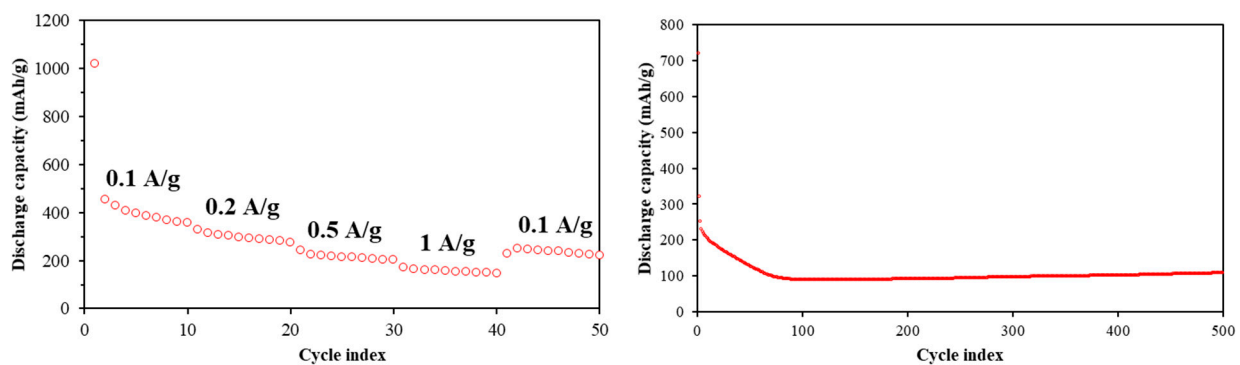

**Figure S8.** Rate capability (on the left) and long-term test (on the right) performed at 0.5 A/g on commercial SnO<sub>2</sub>

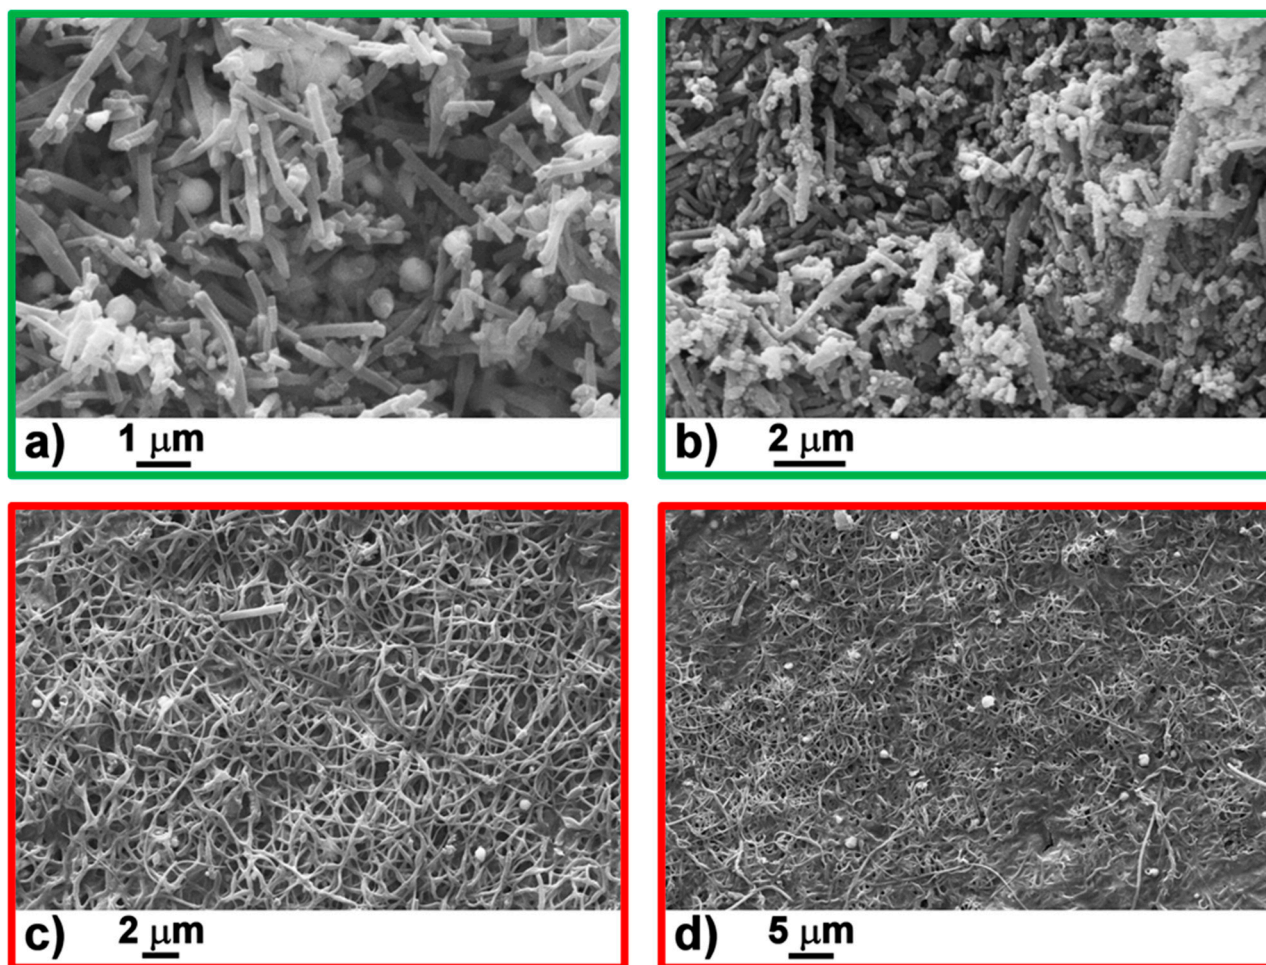

**Figure S9.** Ex situ SEM images collected on the electrodes of pristine and post-mortem Sn/SnO<sub>2</sub>@C-P (a,b) and Sn/SnO<sub>2</sub>@C-S (c,d) respectively.

**Table S1.** Discharge capacity and corresponding coulombic efficiency values for some representative cycles of the rate capability tests on Sn/SnO<sub>2</sub>@C-P and Sn/SnO<sub>2</sub>@C-S.

| Current density (A/g) | Cycle index | Sn/SnO <sub>2</sub> @C - P |                        | Sn/SnO <sub>2</sub> @C - S |                        |
|-----------------------|-------------|----------------------------|------------------------|----------------------------|------------------------|
|                       |             | Capacity (mAh/g)           | Coulombic efficiency % | Capacity (mAh/g)           | Coulombic efficiency % |
| 0.1                   | 1           | 881                        | 68.0                   | 1131                       | 76.8                   |
|                       | 2           | 554                        | 92.0                   | 850                        | 94.6                   |
|                       | 10          | 383                        | 99.1                   | 768                        | 98.1                   |
| 0.2                   | 12          | 302                        | 99.4                   | 702                        | 98.3                   |
|                       | 20          | 266                        | 99.5                   | 669                        | 97.8                   |
| 0.5                   | 22          | 161                        | 98.8                   | 560                        | 98.3                   |
|                       | 30          | 123                        | 100.2                  | 531                        | 98.0                   |
| 1                     | 32          | 45                         | 99.6                   | 424                        | 98.7                   |
|                       | 40          | 35                         | 100.8                  | 408                        | 98.3                   |
| 0.1                   | 42          | 351                        | 98.5                   | 673                        | 96.2                   |
|                       | 50          | 327                        | 99.1                   | 637                        | 96.9                   |
